# Supplementary material
Source: MDPI journal article supplement (https://www.mdpi.com/2673-4834/4/3/38)
Supplement: s1 [file s1]

**Table S1:** INMET automatic weather stations (AWS) in the Mato Grosso, Brazil

| <b>AWS</b> | <b>AWS name</b>                  | <b>Biome</b>    | <b>Latitude</b> | <b>Longitude</b> | <b>Altitude</b> |
|------------|----------------------------------|-----------------|-----------------|------------------|-----------------|
| A-901      | Cuiabá                           | Cerrado         | -15.56          | -56.06           | 242             |
| A-902      | Tangará da Serra                 | Amazon          | -14.65          | -57.43           | 440             |
| A-903      | São José do Rio Claro            | Cerrado- Amazon | -13.45          | -56.68           | 340             |
| A-904      | Sorriso                          | Cerrado- Amazon | -12.56          | -55.72           | 379             |
| A-905      | Campo Novo do Parecis            | Cerrado         | -13.79          | -57.84           | 525             |
| A-906      | Guarantã do Norte                | Amazon          | -9.95           | -54.90           | 284             |
| A-907      | Rondonópolis                     | Cerrado         | -16.46          | -54.58           | 290             |
| A-908      | Água Boa                         | Cerrado         | -14.02          | -52.21           | 440             |
| A-910      | Apiacás                          | Amazon          | -9.56           | -57.39           | 218             |
| A-912      | Campo Verde                      | Cerrado         | -15.53          | -55.14           | 748             |
| A-913      | Comodoro                         | Cerrado         | -13.71          | -59.76           | 577             |
| A-914      | Juara                            | Amazon          | -11.28          | -57.53           | 263             |
| A-915      | Paranatinga                      | Cerrado         | -14.42          | -54.04           | 477             |
| A-916      | Querência                        | Amazon          | -12.63          | -52.22           | 361             |
| A-917      | Sinop                            | Cerrado- Amazon | -11.98          | -55.57           | 367             |
| A-918      | Confresa                         | Cerrado- Amazon | -10.64          | -51.57           | 233             |
| A-919      | Cotriguaçu                       | Amazon          | -9.91           | -58.57           | 265             |
| A-920      | Juína                            | Amazon          | -11.38          | -58.77           | 365             |
| A-921      | São Felix do Araguaia            | Cerrado         | -11.62          | -50.73           | 201             |
| A-922      | Vila Bela da Santíssima Trindade | Amazon          | -15.06          | -59.87           | 213             |
| A-924      | Alta Floresta                    | Amazon          | -10.08          | -56.18           | 292             |
| A-926      | Carlinda                         | Amazon          | -9.97           | -55.83           | 294             |
| A-927      | Brasnorte (Novo Mundo)           | Cerrado- Amazon | -12.52          | -58.23           | 426             |
| A-928      | Nova Maringá                     | Cerrado- Amazon | -13.04          | -57.09           | 334             |
| A-929      | Nova Ubiratã                     | Cerrado- Amazon | -13.41          | -54.75           | 466             |
| A-930      | Gaúcha do Norte                  | Cerrado- Amazon | -13.18          | -53.26           | 376             |
| A-931      | Santo Antônio do Leste           | Cerrado         | -14.93          | -53.88           | 664             |
| A-932      | Guiratinga                       | Cerrado         | -16.34          | -53.77           | 525             |
| A-933      | Itiquira                         | Cerrado         | -17.17          | -54.50           | 593             |
| A-934      | Alto Taquari                     | Cerrado         | -17.84          | -53.29           | 862             |
| A-935      | Porto Estrela                    | Cerrado         | -15.32          | -57.23           | 148             |
| A-936      | Salto do Céu                     | Amazon          | -15.12          | -58.13           | 301             |
| A-937      | Pontes de Lacerda                | Amazon          | -15.23          | -59.35           | 273             |

**Table S2:** Lower and upper sample limits (Inf - Sup), corresponding to the 2.5th and 97.5th percentiles, of the meteorological variable downward solar radiation (SRD - MJ m<sup>-2</sup> day<sup>-1</sup>) observed in the 33 AWS of Mato Grosso state, Brazil.

| AWS code | Jan         | Feb         | Mar         | Apr         | May         | Jun         | Jul         | Aug         | Sep         | Oct         | Nov         | Dec         |
|----------|-------------|-------------|-------------|-------------|-------------|-------------|-------------|-------------|-------------|-------------|-------------|-------------|
| A-901    | 06.8 - 21.8 | 08.9 - 19.1 | 06.5 - 22.4 | 06.5 - 20.2 | 06.8 - 18.0 | 06.7 - 17.0 | 05.5 - 18.2 | 06.2 - 19.1 | 07.2 - 21.1 | 10.7 - 22.3 | 10.8 - 23.2 | 10.5 - 21.7 |
| A-902    | 17.3 - 24.8 | 15.5 - 23.1 | 16.3 - 21.3 | 14.1 - 19.3 | 13.5 - 18.5 | 15.0 - 21.7 | 12.6 - 19.4 | 16.2 - 21.5 | 16.7 - 21.0 | 14.9 - 20.3 | 16.9 - 23.7 | 16.3 - 25.0 |
| A-903    | 16.3 - 21.7 | 15.0 - 21.2 | 15.0 - 20.6 | 14.4 - 19.9 | 14.1 - 17.9 | 12.6 - 18.8 | 14.5 - 17.7 | 15.9 - 20.8 | 14.3 - 21.2 | 17.2 - 20.9 | 16.1 - 20.3 | 15.3 - 21.4 |
| A-904    | 15.3 - 20.6 | 15.4 - 19.2 | 16.1 - 22.9 | 14.7 - 20.2 | 15.7 - 19.9 | 14.7 - 17.3 | 14.3 - 18.4 | 15.7 - 20.9 | 17.0 - 23.3 | 17.9 - 24.4 | 16.0 - 23.1 | 15.4 - 22.2 |
| A-905    | 14.4 - 20.2 | 14.0 - 18.8 | 15.2 - 22.3 | 12.5 - 18.8 | 12.8 - 17.6 | 11.4 - 16.2 | 12.4 - 16.6 | 14.0 - 18.8 | 14.7 - 21.8 | 14.8 - 21.8 | 15.2 - 20.8 | 16.6 - 21.6 |
| A-906    | 13.0 - 16.8 | 11.6 - 20.1 | 07.4 - 18.0 | 04.1 - 17.9 | 03.0 - 17.4 | 02.6 - 18.0 | 01.9 - 16.9 | 02.9 - 18.5 | 05.8 - 18.5 | 12.4 - 18.8 | 14.0 - 19.5 | 12.1 - 20.8 |
| A-907    | 12.7 - 22.3 | 15.5 - 21.3 | 15.0 - 21.2 | 15.7 - 20.4 | 14.8 - 16.8 | 14.9 - 16.4 | 15.3 - 19.1 | 17.1 - 19.6 | 17.3 - 20.2 | 18.0 - 22.8 | 17.3 - 22.4 | 17.0 - 20.9 |
| A-908    | 15.9 - 22.7 | 17.1 - 20.9 | 17.1 - 21.1 | 16.6 - 20.2 | 14.1 - 18.9 | 09.4 - 18.5 | 09.1 - 19.3 | 10.2 - 21.3 | 11.9 - 23.2 | 15.2 - 23.6 | 16.5 - 23.2 | 17.5 - 21.9 |
| A-910    | 13.9 - 18.9 | 14.8 - 20.4 | 15.8 - 19.6 | 15.1 - 19.5 | 14.6 - 18.8 | 15.9 - 19.2 | 14.5 - 19.0 | 13.4 - 20.8 | 14.2 - 22.8 | 17.2 - 22.9 | 16.4 - 20.7 | 14.2 - 20.3 |
| A-912    | 16.1 - 24.2 | 14.8 - 19.9 | 15.9 - 19.7 | 16.9 - 20.7 | 16.0 - 19.2 | 11.7 - 17.7 | 16.0 - 19.1 | 18.2 - 20.2 | 15.9 - 21.4 | 16.1 - 21.4 | 18.0 - 22.6 | 18.7 - 23.1 |
| A-913    | 16.0 - 19.6 | 15.2 - 20.4 | 15.6 - 19.1 | 14.8 - 18.4 | 14.2 - 18.2 | 14.9 - 18.8 | 15.5 - 19.9 | 17.8 - 21.2 | 17.0 - 23.1 | 18.1 - 22.7 | 16.6 - 20.9 | 16.4 - 21.5 |
| A-914    | 16.2 - 20.4 | 15.0 - 20.5 | 16.0 - 19.4 | 15.1 - 19.2 | 15.4 - 18.4 | 13.9 - 16.9 | 14.6 - 17.3 | 14.7 - 18.9 | 16.6 - 21.4 | 17.6 - 23.6 | 16.9 - 22.2 | 15.7 - 20.9 |
| A-915    | 16.4 - 25.7 | 15.1 - 22.9 | 16.4 - 22.7 | 13.9 - 22.2 | 14.5 - 19.7 | 14.5 - 19.3 | 14.7 - 20.3 | 15.2 - 21.7 | 16.0 - 24.5 | 17.4 - 24.0 | 12.9 - 24.6 | 16.6 - 23.6 |
| A-916    | 15.8 - 21.3 | 15.3 - 20.8 | 16.9 - 21.1 | 16.7 - 21.5 | 16.8 - 19.2 | 13.7 - 19.3 | 17.5 - 19.8 | 18.7 - 21.5 | 18.6 - 24.2 | 17.6 - 23.2 | 17.2 - 23.6 | 17.0 - 23.7 |
| A-917    | 15.5 - 23.5 | 16.1 - 21.4 | 16.7 - 21.7 | 16.8 - 21.5 | 15.5 - 21.2 | 15.6 - 23.2 | 17.9 - 23.3 | 18.1 - 24.1 | 16.6 - 24.5 | 17.7 - 25.3 | 16.8 - 23.9 | 17.0 - 22.1 |
| A-918    | 15.8 - 24.2 | 13.6 - 20.9 | 15.8 - 21.9 | 14.9 - 19.6 | 15.2 - 17.8 | 13.0 - 18.7 | 15.0 - 19.4 | 17.7 - 21.3 | 15.4 - 22.7 | 18.0 - 24.1 | 17.6 - 26.3 | 16.3 - 24.8 |
| A-919    | 12.8 - 17.9 | 12.1 - 19.1 | 14.1 - 18.5 | 14.7 - 18.2 | 14.2 - 17.9 | 15.4 - 18.4 | 16.2 - 18.8 | 13.6 - 20.0 | 12.8 - 21.7 | 13.0 - 21.9 | 11.8 - 20.6 | 13.0 - 18.8 |
| A-920    | 15.0 - 18.8 | 15.2 - 21.3 | 16.5 - 19.1 | 15.1 - 18.1 | 13.9 - 17.7 | 13.8 - 17.0 | 12.8 - 18.9 | 16.0 - 20.7 | 16.4 - 21.9 | 19.2 - 21.9 | 16.8 - 20.5 | 15.9 - 21.3 |
| A-921    | 15.2 - 24.3 | 13.2 - 22.6 | 13.0 - 21.1 | 13.7 - 20.8 | 13.1 - 19.1 | 12.7 - 19.0 | 14.6 - 19.6 | 17.5 - 21.9 | 16.6 - 24.8 | 18.7 - 24.4 | 17.4 - 27.2 | 16.5 - 25.7 |
| A-922    | 07.6 - 22.3 | 05.2 - 19.6 | 11.9 - 21.4 | 08.9 - 19.5 | 07.6 - 17.1 | 06.0 - 18.0 | 10.7 - 18.4 | 16.9 - 19.7 | 16.2 - 20.5 | 14.4 - 19.3 | 13.6 - 21.2 | 10.6 - 20.4 |
| A-924    | 13.6 - 19.5 | 14.7 - 21.4 | 13.8 - 18.7 | 13.6 - 18.6 | 12.4 - 17.6 | 12.0 - 18.2 | 13.2 - 19.2 | 14.8 - 21.1 | 15.4 - 22.5 | 17.5 - 23.2 | 16.0 - 21.7 | 15.9 - 21.5 |
| A-926    | 16.2 - 20.6 | 16.6 - 23.1 | 16.3 - 20.6 | 17.0 - 20.2 | 16.9 - 19.3 | 18.2 - 19.9 | 18.6 - 20.6 | 19.3 - 21.8 | 18.8 - 23.0 | 18.8 - 23.1 | 18.4 - 21.6 | 17.1 - 21.5 |
| A-927    | 18.0 - 23.5 | 16.5 - 22.0 | 16.6 - 21.2 | 16.6 - 21.8 | 12.0 - 25.2 | 16.6 - 22.9 | 21.8 - 29.3 | 23.4 - 28.6 | 18.8 - 24.5 | 19.6 - 24.6 | 17.6 - 23.5 | 18.3 - 23.2 |
| A-928    | 14.9 - 21.1 | 15.2 - 19.8 | 15.7 - 19.5 | 15.9 - 19.1 | 14.9 - 17.2 | 14.5 - 17.0 | 13.6 - 18.0 | 15.6 - 20.2 | 16.5 - 22.3 | 17.5 - 22.2 | 16.4 - 20.3 | 16.2 - 21.0 |
| A-929    | 16.0 - 23.1 | 16.2 - 22.9 | 17.2 - 21.6 | 16.7 - 21.2 | 15.9 - 20.1 | 16.2 - 19.1 | 17.5 - 19.9 | 19.2 - 21.6 | 19.1 - 23.5 | 18.3 - 23.7 | 16.8 - 23.3 | 16.5 - 23.8 |
| A-930    | 16.4 - 24.1 | 16.0 - 23.9 | 16.7 - 21.4 | 17.4 - 21.9 | 17.0 - 19.4 | 16.3 - 19.7 | 16.0 - 20.2 | 16.8 - 21.6 | 17.4 - 23.7 | 18.8 - 23.8 | 17.3 - 24.0 | 18.0 - 22.3 |
| A-931    | 17.2 - 22.6 | 17.6 - 22.3 | 17.3 - 21.5 | 17.4 - 22.3 | 16.0 - 19.7 | 16.5 - 19.2 | 17.2 - 19.4 | 19.1 - 21.1 | 18.7 - 24.0 | 18.9 - 23.6 | 16.4 - 24.1 | 18.4 - 23.6 |
| A-932    | 15.4 - 22.1 | 14.3 - 19.8 | 13.1 - 20.1 | 10.8 - 18.9 | 13.8 - 19.3 | 13.7 - 17.7 | 14.4 - 19.9 | 15.4 - 20.2 | 13.6 - 21.1 | 14.6 - 21.6 | 15.8 - 22.2 | 16.3 - 21.3 |
| A-933    | 17.2 - 23.4 | 17.2 - 21.2 | 15.3 - 21.8 | 16.4 - 20.3 | 15.3 - 18.6 | 13.9 - 17.6 | 15.5 - 18.0 | 16.9 - 19.9 | 18.2 - 23.1 | 19.4 - 23.5 | 18.6 - 24.7 | 18.3 - 23.6 |
| A-934    | 16.5 - 22.7 | 17.4 - 20.4 | 14.8 - 21.9 | 15.9 - 20.1 | 15.5 - 18.6 | 15.2 - 17.4 | 15.9 - 18.0 | 17.2 - 20.7 | 18.1 - 22.4 | 18.0 - 22.9 | 18.1 - 23.8 | 17.5 - 21.9 |
| A-935    | 16.7 - 22.1 | 15.6 - 21.3 | 16.2 - 20.3 | 15.6 - 18.5 | 13.7 - 16.6 | 13.0 - 15.5 | 14.4 - 16.2 | 13.8 - 18.5 | 13.2 - 21.3 | 16.8 - 22.0 | 17.4 - 22.0 | 16.3 - 22.9 |
| A-936    | 16.4 - 20.3 | 14.1 - 19.4 | 14.8 - 20.6 | 14.1 - 18.4 | 12.5 - 17.3 | 13.8 - 17.2 | 14.5 - 18.3 | 16.8 - 20.2 | 16.8 - 22.2 | 17.2 - 21.8 | 15.6 - 21.4 | 14.2 - 19.4 |
| A-937    | 16.7 - 22.2 | 15.4 - 19.7 | 15.3 - 20.6 | 12.7 - 19.2 | 10.5 - 17.6 | 11.9 - 17.1 | 13.9 - 17.6 | 15.5 - 19.7 | 17.4 - 21.5 | 18.6 - 21.8 | 17.2 - 22.0 | 15.7 - 21.8 |

**Table S3:** Lower and upper sample limits (Inf - Sup), corresponding to the 2.5th and 97.5th percentiles, of the meteorological variable relative humidity (RH - %) observed in the 33 AWS of Mato Grosso state, Brazil.

| AWS code | Jan         | Feb         | Mar         | Apr         | May         | Jun         | Jul         | Aug         | Sep         | Oct         | Nov         | Dec         |
|----------|-------------|-------------|-------------|-------------|-------------|-------------|-------------|-------------|-------------|-------------|-------------|-------------|
| A-901    | 70.4 - 80.6 | 74.2 - 82.7 | 74.6 - 83.2 | 70.0 - 81.5 | 57.5 - 74.1 | 53.5 - 70.0 | 44.1 - 65.4 | 38.9 - 52.8 | 37.1 - 57.6 | 59.0 - 69.7 | 64.4 - 79.5 | 68.2 - 83.7 |
| A-902    | 75.7 - 88.3 | 81.6 - 88.5 | 78.8 - 90.6 | 75.2 - 91.3 | 67.6 - 84.4 | 60.2 - 76.0 | 44.5 - 70.3 | 42.2 - 57.6 | 42.2 - 65.3 | 59.9 - 78.1 | 74.9 - 84.5 | 78.0 - 88.6 |
| A-903    | 81.2 - 89.7 | 80.1 - 86.2 | 76.1 - 85.8 | 68.4 - 85.0 | 69.1 - 85.3 | 61.8 - 77.3 | 58.9 - 68.9 | 51.7 - 68.6 | 48.2 - 77.0 | 60.7 - 81.7 | 70.0 - 89.4 | 67.1 - 88.8 |
| A-904    | 74.1 - 83.6 | 74.9 - 83.2 | 73.8 - 81.1 | 68.4 - 79.7 | 60.0 - 73.8 | 51.4 - 66.6 | 43.5 - 55.4 | 40.1 - 51.0 | 44.7 - 62.7 | 60.3 - 73.3 | 67.8 - 81.5 | 72.2 - 82.6 |
| A-905    | 80.5 - 89.9 | 81.9 - 90.7 | 79.8 - 90.2 | 69.5 - 86.9 | 64.2 - 83.2 | 58.1 - 75.4 | 46.7 - 63.5 | 46.3 - 60.8 | 48.2 - 68.9 | 59.7 - 83.2 | 65.5 - 88.5 | 65.7 - 92.1 |
| A-906    | 82.7 - 91.4 | 83.7 - 93.7 | 84.4 - 90.6 | 80.5 - 89.1 | 77.0 - 83.9 | 68.4 - 80.4 | 61.2 - 68.4 | 52.1 - 65.7 | 55.5 - 77.2 | 65.6 - 81.7 | 59.2 - 86.1 | 78.4 - 87.1 |
| A-907    | 71.2 - 83.8 | 76.5 - 83.4 | 73.2 - 84.3 | 69.5 - 80.2 | 63.8 - 76.7 | 59.5 - 77.0 | 51.8 - 67.5 | 41.8 - 55.9 | 35.3 - 65.0 | 47.7 - 76.1 | 52.6 - 81.3 | 62.4 - 82.7 |
| A-908    | 76.0 - 86.8 | 77.4 - 86.2 | 71.3 - 84.7 | 67.5 - 83.8 | 62.2 - 79.3 | 54.0 - 69.7 | 44.3 - 57.1 | 36.4 - 50.0 | 31.5 - 65.8 | 52.1 - 76.1 | 62.2 - 82.8 | 69.0 - 84.3 |
| A-910    | 79.2 - 90.4 | 79.4 - 88.5 | 83.0 - 87.4 | 79.1 - 86.1 | 72.1 - 83.3 | 56.5 - 77.2 | 55.4 - 69.2 | 51.9 - 64.4 | 52.8 - 73.2 | 62.1 - 80.7 | 70.9 - 88.1 | 73.6 - 89.7 |
| A-912    | 77.5 - 87.6 | 80.2 - 86.9 | 77.1 - 88.1 | 67.1 - 84.3 | 68.2 - 80.8 | 57.7 - 72.7 | 42.2 - 62.9 | 40.0 - 56.7 | 36.8 - 68.8 | 59.2 - 80.0 | 64.9 - 84.7 | 77.6 - 86.9 |
| A-913    | 83.8 - 90.9 | 85.0 - 89.2 | 83.1 - 91.7 | 81.7 - 91.3 | 79.9 - 88.7 | 76.6 - 86.0 | 67.6 - 80.9 | 61.1 - 75.6 | 63.7 - 77.7 | 75.4 - 82.4 | 75.5 - 86.7 | 82.5 - 90.3 |
| A-914    | 80.0 - 88.5 | 82.7 - 91.4 | 83.3 - 87.4 | 78.4 - 86.7 | 73.4 - 83.5 | 66.5 - 77.5 | 55.3 - 75.0 | 45.6 - 70.8 | 51.0 - 72.8 | 69.8 - 81.9 | 76.1 - 83.7 | 80.8 - 92.5 |
| A-915    | 79.7 - 88.2 | 81.5 - 85.6 | 77.1 - 85.2 | 71.5 - 85.4 | 61.4 - 81.4 | 54.8 - 72.4 | 50.2 - 60.9 | 44.0 - 56.7 | 40.9 - 71.5 | 60.1 - 75.9 | 72.2 - 82.6 | 76.7 - 85.6 |
| A-916    | 71.0 - 88.4 | 81.4 - 86.4 | 67.9 - 85.2 | 64.4 - 86.1 | 65.5 - 82.8 | 56.3 - 77.6 | 52.2 - 70.9 | 48.1 - 64.3 | 44.6 - 71.8 | 51.3 - 80.5 | 43.3 - 83.9 | 64.4 - 86.6 |
| A-917    | 79.8 - 87.8 | 77.5 - 86.8 | 77.7 - 85.3 | 75.9 - 84.5 | 61.3 - 80.0 | 52.1 - 71.6 | 46.5 - 57.8 | 42.8 - 55.8 | 46.1 - 71.1 | 63.4 - 77.0 | 71.3 - 82.9 | 77.6 - 86.5 |
| A-918    | 64.2 - 84.5 | 76.3 - 88.3 | 69.1 - 87.2 | 63.4 - 85.1 | 65.4 - 79.4 | 49.5 - 70.6 | 41.9 - 58.2 | 33.4 - 51.9 | 32.5 - 67.8 | 48.8 - 80.3 | 46.7 - 84.2 | 62.4 - 85.3 |
| A-919    | 83.3 - 92.3 | 82.9 - 93.2 | 84.7 - 91.1 | 75.0 - 90.9 | 71.8 - 88.1 | 62.5 - 82.9 | 55.7 - 72.8 | 46.6 - 72.3 | 64.4 - 77.8 | 70.7 - 82.4 | 78.4 - 87.2 | 79.6 - 88.4 |
| A-920    | 80.6 - 89.8 | 82.1 - 92.0 | 83.8 - 89.7 | 77.9 - 88.4 | 73.8 - 83.9 | 58.8 - 78.0 | 50.0 - 67.9 | 45.3 - 64.5 | 53.4 - 75.6 | 69.8 - 84.5 | 78.0 - 87.6 | 77.9 - 87.2 |
| A-921    | 69.0 - 85.6 | 77.2 - 85.8 | 67.8 - 85.6 | 72.8 - 86.2 | 68.3 - 80.4 | 61.8 - 75.8 | 50.6 - 66.9 | 46.4 - 60.1 | 41.2 - 68.2 | 60.2 - 81.6 | 50.1 - 83.9 | 61.8 - 85.5 |
| A-922    | 77.9 - 85.3 | 78.0 - 86.1 | 80.1 - 89.2 | 76.2 - 87.8 | 72.9 - 85.4 | 70.3 - 84.0 | 60.9 - 78.7 | 54.7 - 69.1 | 53.4 - 67.2 | 62.5 - 74.0 | 68.4 - 81.8 | 74.6 - 84.4 |
| A-924    | 84.6 - 98.1 | 83.9 - 99.9 | 84.4 - 90.5 | 79.8 - 90.5 | 79.0 - 84.8 | 58.6 - 81.1 | 52.7 - 71.2 | 46.8 - 72.1 | 52.7 - 76.2 | 71.9 - 82.1 | 78.1 - 91.0 | 81.7 - 92.7 |
| A-926    | 78.5 - 86.8 | 72.4 - 87.1 | 78.5 - 85.8 | 75.5 - 85.6 | 72.2 - 81.2 | 59.8 - 73.5 | 49.0 - 59.9 | 43.9 - 60.5 | 54.6 - 74.9 | 59.3 - 79.3 | 61.0 - 85.8 | 72.9 - 86.1 |
| A-927    | 79.4 - 88.9 | 81.6 - 88.1 | 83.7 - 88.4 | 76.5 - 86.8 | 69.8 - 84.6 | 56.6 - 73.8 | 45.5 - 61.6 | 41.1 - 56.7 | 47.4 - 68.1 | 64.2 - 82.4 | 75.3 - 86.5 | 79.5 - 87.3 |
| A-928    | 78.9 - 85.0 | 79.1 - 84.1 | 77.7 - 83.5 | 73.8 - 82.3 | 68.0 - 78.5 | 62.5 - 75.5 | 56.0 - 68.2 | 51.6 - 60.1 | 55.6 - 67.7 | 64.3 - 77.5 | 70.5 - 82.2 | 74.3 - 83.8 |
| A-929    | 79.7 - 87.5 | 77.8 - 88.4 | 75.9 - 85.9 | 69.6 - 82.9 | 60.6 - 79.6 | 52.6 - 69.7 | 43.8 - 54.5 | 35.6 - 51.4 | 30.6 - 67.0 | 44.1 - 76.0 | 56.8 - 86.0 | 74.2 - 86.6 |
| A-930    | 67.8 - 84.0 | 71.4 - 82.7 | 64.7 - 81.9 | 59.9 - 80.6 | 57.5 - 75.4 | 52.6 - 67.1 | 41.6 - 58.3 | 40.5 - 56.6 | 35.5 - 67.9 | 50.5 - 76.0 | 47.4 - 80.1 | 66.8 - 83.7 |
| A-931    | 75.8 - 85.5 | 76.6 - 84.4 | 76.6 - 84.4 | 67.6 - 83.0 | 60.9 - 80.1 | 54.1 - 69.8 | 42.3 - 57.5 | 35.1 - 52.5 | 29.6 - 66.0 | 53.7 - 76.6 | 63.3 - 84.1 | 71.4 - 84.1 |
| A-932    | 72.1 - 84.2 | 74.3 - 83.6 | 73.2 - 85.3 | 63.1 - 82.3 | 56.8 - 75.2 | 52.0 - 70.5 | 43.7 - 61.2 | 37.6 - 49.9 | 32.7 - 66.1 | 51.7 - 71.2 | 55.6 - 81.6 | 72.0 - 83.1 |
| A-933    | 75.3 - 88.2 | 77.9 - 86.7 | 73.1 - 88.4 | 67.7 - 84.4 | 60.9 - 79.9 | 51.9 - 72.2 | 35.8 - 63.8 | 32.9 - 52.5 | 29.3 - 65.0 | 51.9 - 75.7 | 68.2 - 83.9 | 74.1 - 88.8 |
| A-934    | 77.3 - 87.7 | 78.6 - 86.4 | 75.7 - 88.3 | 65.9 - 84.5 | 63.4 - 80.8 | 54.2 - 75.5 | 41.4 - 67.0 | 38.8 - 53.1 | 36.2 - 70.4 | 55.9 - 78.0 | 56.8 - 84.5 | 68.6 - 86.4 |
| A-935    | 78.7 - 84.0 | 80.5 - 86.8 | 80.2 - 85.9 | 76.4 - 84.6 | 72.2 - 83.0 | 69.3 - 81.1 | 65.2 - 77.9 | 55.3 - 67.2 | 53.8 - 70.7 | 63.3 - 75.5 | 67.2 - 83.1 | 74.4 - 84.0 |
| A-936    | 78.7 - 87.5 | 80.9 - 88.4 | 80.9 - 89.7 | 77.1 - 88.3 | 71.7 - 84.7 | 69.4 - 81.2 | 61.5 - 77.1 | 57.4 - 67.0 | 59.3 - 70.9 | 68.0 - 76.8 | 71.5 - 83.9 | 77.2 - 85.3 |
| A-937    | 74.5 - 85.0 | 77.3 - 85.3 | 77.8 - 83.8 | 74.0 - 82.3 | 67.0 - 81.2 | 61.5 - 80.5 | 52.4 - 72.8 | 47.1 - 62.3 | 49.9 - 64.2 | 59.3 - 73.0 | 63.9 - 80.5 | 69.8 - 80.2 |

**Table S4:** Lower and upper sample limits (Inf - Sup), corresponding to the 2.5th and 97.5th percentiles, of the meteorological variable maximum air temperature (Tmax - °C) observed in the 33 AWS of Mato Grosso state, Brazil.

| AWS Code | Jan         | Feb         | Mar         | Apr         | May         | Jun         | Jul         | Aug         | Sep         | Oct         | Nov         | Dec         |
|----------|-------------|-------------|-------------|-------------|-------------|-------------|-------------|-------------|-------------|-------------|-------------|-------------|
| A-901    | 34.7 - 38.0 | 34.6 - 37.3 | 33.3 - 37.8 | 33.9 - 37.9 | 33.5 - 37.0 | 33.5 - 36.9 | 35.4 - 37.2 | 37.9 - 41.3 | 38.9 - 42.0 | 36.6 - 42.1 | 34.7 - 39.8 | 34.8 - 38.7 |
| A-902    | 32.3 - 35.6 | 32.3 - 35.0 | 31.2 - 35.0 | 31.9 - 35.1 | 30.5 - 35.2 | 32.2 - 35.3 | 33.9 - 35.6 | 35.9 - 38.7 | 36.7 - 39.9 | 34.9 - 39.9 | 33.1 - 37.8 | 33.2 - 35.0 |
| A-903    | 33.1 - 36.9 | 33.6 - 36.4 | 33.0 - 35.8 | 32.7 - 35.9 | 32.8 - 35.6 | 32.9 - 35.8 | 34.6 - 36.9 | 37.0 - 39.4 | 37.2 - 40.4 | 35.8 - 40.2 | 31.7 - 38.6 | 32.2 - 37.2 |
| A-904    | 31.4 - 37.1 | 33.1 - 36.2 | 32.5 - 35.6 | 32.8 - 36.4 | 32.9 - 36.2 | 33.4 - 36.0 | 34.7 - 36.4 | 36.5 - 39.2 | 37.9 - 39.7 | 36.0 - 40.6 | 34.1 - 38.8 | 32.6 - 36.8 |
| A-905    | 31.8 - 35.8 | 32.2 - 34.8 | 32.1 - 35.9 | 31.2 - 36.0 | 30.7 - 34.6 | 32.0 - 34.3 | 33.3 - 35.2 | 35.5 - 37.9 | 35.9 - 38.4 | 34.3 - 38.3 | 32.8 - 38.0 | 32.0 - 35.4 |
| A-906    | 33.1 - 35.7 | 33.4 - 35.9 | 32.6 - 35.8 | 32.8 - 35.5 | 33.1 - 36.0 | 34.0 - 35.8 | 35.0 - 36.6 | 37.2 - 39.0 | 36.7 - 39.4 | 34.8 - 39.1 | 34.0 - 36.7 | 33.4 - 37.0 |
| A-907    | 34.1 - 38.3 | 34.5 - 36.5 | 34.3 - 39.9 | 33.8 - 36.9 | 33.1 - 36.8 | 33.2 - 35.7 | 35.1 - 36.7 | 37.2 - 39.9 | 39.0 - 42.3 | 37.9 - 42.0 | 34.8 - 39.0 | 32.3 - 38.1 |
| A-908    | 31.9 - 35.9 | 32.5 - 36.6 | 32.0 - 36.2 | 32.2 - 35.1 | 32.0 - 35.8 | 32.3 - 35.9 | 33.4 - 35.7 | 35.8 - 39.2 | 37.9 - 43.5 | 35.7 - 43.8 | 32.3 - 38.0 | 32.7 - 36.9 |
| A-910    | 32.8 - 35.5 | 32.9 - 35.7 | 32.6 - 36.2 | 33.6 - 36.7 | 33.4 - 36.4 | 33.8 - 36.6 | 35.8 - 37.3 | 36.4 - 38.9 | 37.2 - 38.7 | 35.5 - 38.8 | 34.2 - 37.0 | 33.8 - 35.7 |
| A-912    | 30.5 - 33.6 | 31.0 - 33.9 | 30.6 - 33.2 | 30.3 - 33.6 | 29.4 - 32.0 | 29.8 - 32.2 | 31.0 - 32.8 | 32.8 - 35.8 | 34.6 - 37.3 | 32.9 - 37.3 | 31.7 - 34.9 | 30.7 - 33.1 |
| A-913    | 30.1 - 33.0 | 30.3 - 32.8 | 30.5 - 33.2 | 31.0 - 33.6 | 30.3 - 32.4 | 31.0 - 33.5 | 32.6 - 34.1 | 33.9 - 36.9 | 34.2 - 36.7 | 32.1 - 36.0 | 31.6 - 36.5 | 31.2 - 33.8 |
| A-914    | 32.8 - 36.1 | 33.2 - 36.5 | 32.7 - 37.2 | 33.3 - 36.1 | 33.1 - 36.4 | 33.4 - 36.4 | 34.9 - 37.8 | 37.3 - 40.2 | 37.1 - 40   | 35.7 - 38.6 | 33.7 - 36.6 | 33.6 - 36.6 |
| A-915    | 31.6 - 35.8 | 32.4 - 34.9 | 32.2 - 34.7 | 31.6 - 35.8 | 32.2 - 35.2 | 32.0 - 34.8 | 32.7 - 35.8 | 34.9 - 38.4 | 35.8 - 41.3 | 34.9 - 41.9 | 33.2 - 37.5 | 33.1 - 36.8 |
| A-916    | 32.9 - 36.4 | 33.4 - 36.7 | 33.2 - 36.8 | 33.2 - 37.1 | 33.1 - 36.5 | 32.8 - 36.9 | 34.0 - 37.8 | 36.8 - 40.2 | 38.0 - 41.2 | 36.0 - 42.5 | 34.2 - 37.9 | 34.1 - 38.2 |
| A-917    | 32.3 - 35.9 | 32.6 - 36.7 | 32.5 - 35.8 | 32.3 - 36.0 | 32.9 - 36.5 | 33.8 - 35.9 | 34.6 - 36.6 | 36.4 - 38.9 | 37.1 - 40.5 | 35.4 - 41.4 | 33.8 - 38.6 | 32.4 - 37.1 |
| A-918    | 33.9 - 40.0 | 33.5 - 37.1 | 33.8 - 37.7 | 33.3 - 36.6 | 34.0 - 36.7 | 33.3 - 36.3 | 34.8 - 37.0 | 37.8 - 40.7 | 38.4 - 42.2 | 35.3 - 43.4 | 34.7 - 41.6 | 33.8 - 39.0 |
| A-919    | 31.6 - 35.7 | 32.6 - 35.3 | 31.5 - 35.0 | 32.3 - 34.7 | 32.7 - 34.7 | 33.2 - 35.7 | 34.1 - 36.9 | 35.9 - 38.8 | 36.3 - 38.5 | 34.8 - 37.6 | 32.9 - 35.7 | 33.3 - 35.5 |
| A-920    | 31.7 - 34.2 | 31.6 - 34.2 | 31.1 - 33.9 | 31.8 - 34.2 | 31.9 - 35.8 | 32.0 - 34.4 | 33.7 - 35.4 | 35.6 - 37.5 | 35.1 - 37.7 | 33.9 - 38.0 | 32.7 - 35.2 | 31.2 - 34.6 |
| A-921    | 34.0 - 40.5 | 33.9 - 37.7 | 34.1 - 36.8 | 32.9 - 37.1 | 33.3 - 37.1 | 33.2 - 37.3 | 34.6 - 38.9 | 37.6 - 40.0 | 39.0 - 41.9 | 35.4 - 44.4 | 34.5 - 41.1 | 34.7 - 39.4 |
| A-922    | 34.0 - 37.1 | 33.3 - 35.6 | 34.6 - 39.1 | 33.3 - 36.7 | 33.2 - 36.8 | 33.8 - 36.4 | 35.2 - 37.1 | 36.0 - 40.1 | 38.1 - 40.8 | 37.1 - 40.7 | 35.3 - 39.9 | 35.0 - 37.4 |
| A-924    | 32.1 - 34.8 | 32.4 - 35.5 | 31.5 - 34.2 | 32.4 - 34.9 | 31.9 - 35.3 | 32.1 - 35.6 | 34.1 - 36.8 | 35.7 - 38.2 | 36.1 - 38.7 | 34.4 - 38.4 | 33.0 - 37.1 | 32.1 - 35.8 |
| A-926    | 31.9 - 34.4 | 30.5 - 33.6 | 31.9 - 34.6 | 31.3 - 34.6 | 32.3 - 35.0 | 32.3 - 35.0 | 33.6 - 35.9 | 36.0 - 38.0 | 35.2 - 38.1 | 33.6 - 38.0 | 32.2 - 35.2 | 31.1 - 34.6 |
| A-927    | 31.3 - 33.9 | 31.0 - 34.0 | 31.3 - 36.1 | 31.3 - 35.4 | 31.0 - 35.1 | 32.2 - 35.4 | 34.1 - 36.0 | 35.6 - 37.7 | 36.1 - 38.7 | 34.3 - 38.5 | 32.4 - 35.4 | 31.9 - 34.7 |
| A-928    | 32.6 - 40.2 | 32.7 - 40.2 | 31.9 - 40.2 | 32.7 - 40.2 | 33.3 - 40.1 | 33.2 - 37.9 | 34.5 - 38.0 | 36.6 - 38.8 | 36.9 - 39.9 | 35.3 - 40.2 | 34.4 - 39.9 | 33.4 - 38.2 |
| A-929    | 31.0 - 35.3 | 32.0 - 34.8 | 31.9 - 35.8 | 32.0 - 36.2 | 31.6 - 34.8 | 32.7 - 34.8 | 33.9 - 36.0 | 36.1 - 38.2 | 36.6 - 39.7 | 35.6 - 41.1 | 33.3 - 37.7 | 31.6 - 37.0 |
| A-930    | 33.8 - 37.6 | 32.8 - 37.4 | 32.7 - 36.5 | 33.3 - 37.7 | 33.3 - 36.4 | 33.0 - 36.2 | 34.7 - 37.8 | 36.3 - 40.6 | 38.0 - 43.0 | 35.9 - 41.8 | 33.7 - 39.0 | 33.7 - 38.2 |
| A-931    | 31.3 - 35.0 | 31.5 - 34.9 | 31.2 - 34.6 | 30.4 - 34.2 | 31.3 - 33.4 | 31.3 - 33.3 | 31.8 - 34.0 | 34.8 - 37.4 | 36.1 - 40.1 | 34.7 - 41.0 | 32.3 - 38.0 | 31.8 - 36.0 |
| A-932    | 33.7 - 37.2 | 33.3 - 37.2 | 33.0 - 36.6 | 32.7 - 36.8 | 32.2 - 35.6 | 32.4 - 35.0 | 33.9 - 36.1 | 35.9 - 39.5 | 37.5 - 41.6 | 35.9 - 42.5 | 35.1 - 39.5 | 33.7 - 38.6 |
| A-933    | 32.4 - 35.7 | 31.7 - 36.0 | 30.8 - 36.2 | 31.4 - 35.2 | 31.1 - 33.8 | 31.2 - 36.8 | 32.2 - 35.8 | 35.3 - 38.5 | 37.1 - 39.0 | 34.7 - 38.8 | 32.7 - 36.7 | 32.9 - 35.6 |
| A-934    | 31.0 - 35.3 | 30.8 - 35.4 | 30.7 - 33.2 | 30.1 - 33.5 | 29.2 - 31.9 | 29.0 - 31.3 | 29.7 - 32.5 | 32.2 - 35.6 | 34.1 - 36.5 | 32.8 - 36.7 | 31.5 - 35.2 | 31.2 - 34.4 |
| A-935    | 34.9 - 36.9 | 33.6 - 36.8 | 32.5 - 37.0 | 33.3 - 38.1 | 33.3 - 37.5 | 33.7 - 36.9 | 35.5 - 37.4 | 37.8 - 40.5 | 38.5 - 41.4 | 36.6 - 41.5 | 35.6 - 40.1 | 34.6 - 38.8 |
| A-936    | 32.6 - 37.1 | 32.6 - 36.5 | 32.8 - 36.3 | 32.7 - 36.6 | 33.2 - 36.0 | 33.2 - 36.3 | 35.0 - 36.7 | 37.0 - 39.7 | 37.7 - 40.8 | 36.0 - 39.9 | 34.6 - 37.4 | 34.2 - 36.3 |
| A-937    | 33.2 - 37.7 | 33.5 - 36.8 | 33.8 - 36.9 | 34.0 - 37.6 | 33.9 - 35.6 | 33.6 - 36.0 | 35.2 - 37.8 | 36.3 - 40.3 | 37.6 - 40.6 | 36.9 - 40.5 | 34.9 - 39.8 | 34.4 - 38.1 |

**Table S5:** Lower and upper sample limits (Inf - Sup), corresponding to the 2.5th and 97.5th percentiles, of the meteorological variable minimum air temperature (Tmin - °C) observed in the 33 AWS of Mato Grosso state, Brazil.

| AWS Code | Jan         | Feb         | Mar         | Apr         | May         | Jun         | Jul         | Aug         | Sep         | Oct         | Nov         | Dec         |
|----------|-------------|-------------|-------------|-------------|-------------|-------------|-------------|-------------|-------------|-------------|-------------|-------------|
| A-901    | 17.8 - 22.9 | 19.9 - 22.1 | 19.1 - 22.3 | 16.8 - 21.2 | 14.4 - 19.9 | 14.4 - 18.3 | 13.5 - 17.3 | 15.5 - 19.2 | 16.7 - 21.4 | 17.0 - 21.6 | 19.2 - 23.2 | 17.7 - 22.3 |
| A-902    | 16.7 - 21.1 | 18.2 - 21.3 | 16.8 - 21.2 | 16.2 - 20.7 | 15.4 - 18.4 | 15.1 - 17.2 | 13.3 - 16.9 | 15.4 - 17.9 | 16.3 - 20.4 | 16.1 - 20.9 | 16.5 - 21.1 | 16.6 - 20.2 |
| A-903    | 18.9 - 22.0 | 18.7 - 21.9 | 18.9 - 21.7 | 13.0 - 21.2 | 10.7 - 17.9 | 12.5 - 16.3 | 08.0 - 14.4 | 11.6 - 15.1 | 14.3 - 19.0 | 16.5 - 20.8 | 17.8 - 21.2 | 18.3 - 21.5 |
| A-904    | 18.6 - 21.6 | 18.2 - 21.4 | 17.6 - 21.5 | 15.2 - 20.6 | 14.0 - 19.8 | 14.8 - 17.7 | 13.8 - 17.3 | 14.4 - 17.7 | 15.5 - 19.8 | 17.9 - 21.0 | 18.2 - 21.1 | 17.1 - 21.3 |
| A-905    | 17.0 - 20.3 | 18.3 - 20.7 | 16.9 - 21.2 | 15.8 - 19.9 | 14.4 - 18.7 | 15.6 - 17.2 | 11.5 - 17.1 | 14.0 - 17.8 | 16.2 - 20.0 | 16.8 - 20.5 | 17.3 - 20.8 | 16.2 - 20.8 |
| A-906    | 19.5 - 21.0 | 19.8 - 21.2 | 20.0 - 21.7 | 18.2 - 21.4 | 17.5 - 20.2 | 17.5 - 19.2 | 17.5 - 19.2 | 17.5 - 19.2 | 17.5 - 19.6 | 18.3 - 20.9 | 19.8 - 21.3 | 19.2 - 21.4 |
| A-907    | 14.9 - 22.0 | 19.3 - 22.0 | 18.4 - 21.9 | 14.1 - 20.8 | 09.0 - 18.3 | 11.6 - 16.8 | 10.4 - 14.7 | 13.3 - 14.8 | 13.7 - 18.2 | 14.9 - 22.5 | 16.9 - 21.9 | 15.3 - 23.2 |
| A-908    | 18.1 - 20.7 | 18.3 - 20.3 | 18.1 - 20.8 | 15.6 - 20.5 | 15.6 - 17.6 | 15.6 - 16.6 | 15.6 - 15.8 | 15.6 - 16.2 | 15.6 - 18.8 | 15.9 - 20.7 | 16.9 - 20.9 | 18.6 - 20.5 |
| A-910    | 20.1 - 22.1 | 20.7 - 22.3 | 20.8 - 22.6 | 16.6 - 22.3 | 15.8 - 21.2 | 16.6 - 19.1 | 15.3 - 19.0 | 16.0 - 19.0 | 17.4 - 21.0 | 20.1 - 21.7 | 20.3 - 22.0 | 20.0 - 21.7 |
| A-912    | 16.3 - 19.3 | 17.3 - 19.7 | 17.1 - 19.8 | 15.2 - 18.6 | 13.1 - 16.8 | 13.6 - 16.2 | 12.9 - 15.5 | 14.6 - 15.9 | 15.4 - 18.8 | 15.9 - 19.5 | 16.8 - 19.2 | 15.4 - 19.0 |
| A-913    | 15.1 - 18.7 | 16.7 - 19.4 | 11.9 - 19.2 | 12.0 - 17.9 | 11.9 - 18.0 | 12.0 - 17.7 | 11.8 - 17.1 | 11.9 - 16.4 | 12.3 - 20.0 | 13.2 - 19.7 | 14.3 - 19.2 | 12.7 - 19.1 |
| A-914    | 20.4 - 23.5 | 20.2 - 24.0 | 20.5 - 21.5 | 13.2 - 21.4 | 10.8 - 20.1 | 13.5 - 17.6 | 06.7 - 17.5 | 11.1 - 17.7 | 15.6 - 19.7 | 18.8 - 21.5 | 19.8 - 22.2 | 17.4 - 22.4 |
| A-915    | 16.7 - 21.1 | 18.2 - 20.0 | 18.0 - 20.5 | 11.9 - 19.9 | 08.2 - 17.5 | 10.5 - 15.7 | 07.8 - 15.1 | 09.4 - 15.7 | 11.5 - 19.7 | 15.5 - 20.6 | 18.2 - 20.8 | 17.2 - 20.7 |
| A-916    | 18.2 - 21.0 | 18.4 - 20.0 | 16.3 - 21.3 | 16.2 - 20.6 | 15.3 - 18.0 | 15.3 - 16.4 | 15.3 - 15.7 | 15.3 - 15.8 | 15.3 - 19.3 | 16.2 - 20.1 | 15.7 - 21.0 | 18.2 - 20.5 |
| A-917    | 18.5 - 21.2 | 18.5 - 20.6 | 19.1 - 21.3 | 14.1 - 20.5 | 12.0 - 18.5 | 13.5 - 17.7 | 11.7 - 16.4 | 12.6 - 16.3 | 14.4 - 17.9 | 18.2 - 20.8 | 18.2 - 21.3 | 17.0 - 20.7 |
| A-918    | 19.6 - 23.7 | 18.5 - 22.5 | 17.4 - 22.1 | 16.7 - 21.5 | 10.8 - 20.1 | 09.7 - 17.9 | 09.0 - 17.6 | 09.7 - 17.7 | 09.3 - 20.7 | 16.7 - 22.7 | 18.8 - 21.7 | 20.0 - 22.7 |
| A-919    | 19.9 - 21.6 | 19.7 - 21.8 | 19.6 - 21.5 | 14.4 - 20.8 | 13.1 - 20.3 | 15.2 - 18.5 | 09.6 - 18.2 | 13.3 - 18.6 | 17.0 - 20.0 | 19.4 - 21.5 | 18.8 - 21.4 | 19.9 - 21.3 |
| A-920    | 19.8 - 21.3 | 19.3 - 21.6 | 19.4 - 21.3 | 15.7 - 20.9 | 15.6 - 19.3 | 16.5 - 18.5 | 14.0 - 17.6 | 15.6 - 19.7 | 17.3 - 20.2 | 18.3 - 20.6 | 19.2 - 21.2 | 18.3 - 21.1 |
| A-921    | 19.5 - 23.8 | 19.9 - 22.9 | 19.6 - 22.2 | 16.4 - 22.0 | 11.0 - 20.5 | 10.1 - 18.8 | 08.3 - 17.9 | 10.2 - 18.9 | 09.8 - 20.6 | 15.6 - 21.9 | 17.4 - 22.2 | 17.5 - 21.5 |
| A-922    | 16.6 - 21.8 | 18.8 - 22.1 | 16.3 - 22.2 | 15.2 - 22.0 | 15.2 - 20   | 15.1 - 17.1 | 14.9 - 16.2 | 15.2 - 16.3 | 15.2 - 18.4 | 15.2 - 20.5 | 15.4 - 22.0 | 15.8 - 21.8 |
| A-924    | 19.7 - 21.3 | 18.5 - 21.2 | 19.5 - 22.1 | 14.3 - 21.2 | 12.6 - 21.5 | 14.1 - 17.2 | 12.0 - 17.4 | 13.3 - 17.2 | 15.0 - 18.7 | 17.6 - 21.0 | 19.2 - 21.0 | 19.6 - 20.9 |
| A-926    | 19.1 - 20.9 | 18.1 - 20.9 | 19.1 - 20.8 | 17.4 - 21.0 | 17.2 - 20.4 | 17.2 - 17.9 | 17.2 - 17.6 | 17.2 - 17.8 | 17.4 - 20.2 | 17.7 - 20.2 | 19.2 - 21.1 | 19.2 - 21.2 |
| A-927    | 18.3 - 20.6 | 18.4 - 21.1 | 19.0 - 20.8 | 14.4 - 20.5 | 14.0 - 18.9 | 15.4 - 18.9 | 11.8 - 17.4 | 14.0 - 19.0 | 16.9 - 21.2 | 17.1 - 21.1 | 18.7 - 20.9 | 18.7 - 20.6 |
| A-928    | 19.1 - 21.7 | 19.3 - 22.5 | 20.1 - 22.3 | 12.8 - 21.0 | 11.2 - 18.3 | 13.0 - 17.2 | 08.6 - 15.9 | 11.7 - 16.4 | 14.3 - 19.6 | 17.5 - 21.2 | 16.7 - 21.3 | 15.8 - 22.3 |
| A-929    | 18.0 - 20.9 | 18.0 - 20.6 | 17.8 - 20.8 | 13.5 - 19.9 | 11.8 - 17.6 | 12.3 - 16.7 | 11.6 - 15.2 | 12.3 - 16.1 | 13.2 - 17.5 | 15.1 - 21.1 | 18.4 - 20.7 | 16.6 - 20.2 |
| A-930    | 19.2 - 21.7 | 18.8 - 21.3 | 18.8 - 21.9 | 16.9 - 21.5 | 16.6 - 19.4 | 16.6 - 18.2 | 16.6 - 16.8 | 16.6 - 17.8 | 16.6 - 19.6 | 16.7 - 20.6 | 19.7 - 21.3 | 18.8 - 21.3 |
| A-931    | 16.5 - 20.7 | 17.3 - 19.5 | 17.3 - 19.9 | 12.2 - 19.2 | 08.8 - 16.0 | 10.2 - 15.7 | 07.6 - 14.2 | 09.7 - 14.3 | 11.7 - 18.4 | 15.1 - 20.6 | 17.5 - 19.7 | 15.4 - 19.4 |
| A-932    | 17.0 - 22.1 | 19.8 - 21.8 | 19.5 - 21.9 | 15.7 - 21.0 | 9.7 - 19.5  | 11.6 - 18.1 | 09.5 - 15.8 | 13.3 - 16.4 | 13.6 - 20.0 | 15.8 - 21.7 | 19.7 - 21.8 | 15.3 - 21.3 |
| A-933    | 15.9 - 20.0 | 18.4 - 20.7 | 17.5 - 20.5 | 15.7 - 19.7 | 12.3 - 18.1 | 13.1 - 16.4 | 13.0 - 16.6 | 14.7 - 16.6 | 15.7 - 18.4 | 15.8 - 20.3 | 17.2 - 19.7 | 15.9 - 20.0 |
| A-934    | 14.1 - 18.5 | 16.5 - 18.4 | 15.8 - 18.6 | 12.1 - 18.0 | 08.7 - 15.3 | 10.6 - 13.0 | 09.0 - 13.7 | 11.7 - 14.4 | 12.2 - 15.8 | 13.0 - 18.3 | 13.3 - 18.5 | 13.9 - 18.0 |
| A-935    | 16.6 - 22.1 | 20.5 - 22.3 | 18.9 - 22.7 | 15.1 - 22.5 | 14.7 - 19.3 | 14.5 - 17.8 | 13.0 - 16.2 | 14.7 - 17.5 | 14.9 - 20.9 | 16.4 - 22.5 | 18.0 - 22.4 | 15.4 - 22.4 |
| A-936    | 15.2 - 21.7 | 19.2 - 21.4 | 16.4 - 20.8 | 15.6 - 21.2 | 15.1 - 19.0 | 15.1 - 18.0 | 13.2 - 16.3 | 14.1 - 16.5 | 15.1 - 18.7 | 15.4 - 21.8 | 15.8 - 21.9 | 16.3 - 21.1 |
| A-937    | 17.0 - 21.8 | 19.4 - 21.5 | 16.0 - 22.1 | 15.9 - 20.8 | 15.8 - 18.3 | 15.8 - 18.0 | 14.5 - 16.8 | 14.6 - 17.0 | 15.9 - 19.4 | 16.6 - 20.8 | 15.8 - 21.8 | 15.8 - 21.4 |

**Table S6:** Lower and upper sample limits (Inf - Sup), corresponding to the 2.5th and 97.5th percentiles, of the meteorological variable Wind speed at 2 m. (WS - m s<sup>-1</sup>) observed in the 33 AWS of Mato Grosso state, Brazil.

| AWS Code | Jan       | Feb       | Mar       | Apr       | May       | Jun       | Jul       | Aug       | Sep       | Oct       | Nov       | Dec       |
|----------|-----------|-----------|-----------|-----------|-----------|-----------|-----------|-----------|-----------|-----------|-----------|-----------|
| A-901    | 0.9 - 1.6 | 0.7 - 1.5 | 0.7 - 1.3 | 0.8 - 1.3 | 0.9 - 1.4 | 1.0 - 1.3 | 1.0 - 1.4 | 1.1 - 1.6 | 1.1 - 1.5 | 0.9 - 1.6 | 1.1 - 1.6 | 0.7 - 1.5 |
| A-902    | 1.3 - 2.0 | 1.1 - 1.6 | 1.1 - 1.6 | 0.9 - 1.7 | 1.1 - 2.0 | 1.7 - 2.2 | 1.6 - 2.4 | 1.6 - 2.5 | 1.4 - 2.5 | 1.1 - 2.3 | 1.3 - 2.3 | 1.1 - 2.2 |
| A-903    | 0.6 - 1.1 | 0.5 - 0.9 | 0.5 - 1.0 | 0.5 - 0.9 | 0.4 - 1.2 | 0.5 - 1.3 | 0.6 - 1.4 | 0.6 - 1.3 | 0.6 - 1.2 | 0.7 - 1.2 | 0.6 - 1.2 | 0.6 - 1.1 |
| A-904    | 0.3 - 1.5 | 0.4 - 1.5 | 0.5 - 1.3 | 0.4 - 1.5 | 0.4 - 1.8 | 0.5 - 1.9 | 0.7 - 2.0 | 0.6 - 2.2 | 0.6 - 2.1 | 0.5 - 1.6 | 0.4 - 1.7 | 0.3 - 1.6 |
| A-905    | 0.9 - 1.4 | 0.9 - 1.3 | 0.9 - 1.2 | 0.9 - 1.3 | 1.0 - 1.4 | 1.0 - 1.4 | 1.0 - 1.6 | 1.3 - 1.7 | 1.1 - 1.5 | 1.1 - 1.5 | 1.1 - 1.5 | 1.1 - 1.6 |
| A-906    | 0.2 - 1.0 | 0.1 - 0.8 | 0.1 - 0.6 | 0.2 - 0.5 | 0.2 - 0.6 | 0.2 - 0.8 | 0.2 - 1.0 | 0.4 - 1.3 | 0.2 - 1.0 | 0.2 - 0.8 | 0.1 - 1.1 | 0.2 - 0.9 |
| A-907    | 0.5 - 1.1 | 0.7 - 1.3 | 0.7 - 1.2 | 0.6 - 1.1 | 0.5 - 1.0 | 0.5 - 1.0 | 0.7 - 1.2 | 1.0 - 1.3 | 1.0 - 1.5 | 1.0 - 1.5 | 0.8 - 1.4 | 0.8 - 1.4 |
| A-908    | 1.1 - 2.1 | 1.0 - 2.0 | 0.9 - 1.6 | 1.0 - 1.6 | 1.2 - 1.9 | 1 - 2.1.0 | 1.6 - 2.3 | 1.9 - 2.5 | 1.8 - 2.4 | 1.6 - 2.1 | 1.5 - 2.0 | 1.3 - 2.0 |
| A-910    | 0.3 - 0.8 | 0.3 - 0.7 | 0.3 - 0.7 | 0.3 - 0.8 | 0.4 - 0.8 | 0.5 - 0.8 | 0.5 - 0.8 | 0.4 - 0.9 | 0.4 - 0.8 | 0.4 - 0.9 | 0.3 - 0.8 | 0.3 - 0.9 |
| A-912    | 0.9 - 2.7 | 1.7 - 2.4 | 1.5 - 2.2 | 1.0 - 1.9 | 1.0 - 2.1 | 1.1 - 2.1 | 1.6 - 2.3 | 1.9 - 2.6 | 1.6 - 2.5 | 1.6 - 2.4 | 1.7 - 2.4 | 1.6 - 2.3 |
| A-913    | 0.8 - 1.4 | 0.8 - 1.3 | 0.5 - 1.1 | 0.5 - 1.1 | 0.7 - 1.1 | 0.6 - 1.2 | 0.5 - 1.5 | 1.0 - 1.4 | 0.8 - 1.3 | 0.6 - 1.4 | 0.4 - 1.3 | 0.5 - 1.4 |
| A-914    | 0.6 - 1.2 | 0.6 - 1.1 | 0.5 - 1.0 | 0.6 - 0.9 | 0.6 - 0.9 | 0.7 - 1.0 | 0.7 - 1.2 | 0.7 - 1.2 | 0.8 - 1.1 | 0.4 - 1.1 | 0.6 - 1.2 | 0.6 - 1.1 |
| A-915    | 0.9 - 1.5 | 1.0 - 1.6 | 0.8 - 1.3 | 0.8 - 1.4 | 0.9 - 1.5 | 1.0 - 1.6 | 1.1 - 1.9 | 1.3 - 1.8 | 1.2 - 1.8 | 1.1 - 1.6 | 1.0 - 1.6 | 1.0 - 1.5 |
| A-916    | 0.7 - 1.1 | 0.5 - 1.2 | 0.6 - 1.1 | 0.5 - 1.0 | 0.4 - 1.3 | 0.6 - 1.4 | 0.6 - 1.5 | 0.6 - 1.5 | 0.7 - 1.6 | 0.7 - 1.3 | 0.4 - 0.9 | 0.6 - 1.2 |
| A-917    | 0.8 - 1.5 | 0.6 - 1.5 | 0.7 - 1.4 | 0.6 - 1.2 | 0.6 - 1.6 | 0.7 - 1.8 | 0.9 - 2.1 | 1.0 - 2.0 | 1.0 - 1.8 | 1.1 - 1.6 | 0.9 - 1.5 | 0.9 - 1.4 |
| A-918    | 0.7 - 1.5 | 0.8 - 1.3 | 0.7 - 1.1 | 0.7 - 1.3 | 0.7 - 1.4 | 0.8 - 1.7 | 0.8 - 1.6 | 1.1 - 1.6 | 1.0 - 1.6 | 0.8 - 1.5 | 0.8 - 1.5 | 0.7 - 1.5 |
| A-919    | 0.6 - 0.9 | 0.5 - 0.9 | 0.4 - 0.8 | 0.6 - 0.8 | 0.7 - 0.9 | 0.7 - 1.0 | 0.8 - 1.0 | 0.8 - 0.9 | 0.7 - 0.9 | 0.7 - 0.9 | 0.6 - 0.9 | 0.6 - 0.9 |
| A-920    | 0.4 - 0.9 | 0.5 - 0.8 | 0.4 - 0.8 | 0.5 - 0.9 | 0.5 - 1.0 | 0.6 - 1.1 | 0.7 - 1.3 | 0.6 - 1.2 | 0.6 - 1.0 | 0.5 - 0.9 | 0.4 - 1.0 | 0.5 - 0.9 |
| A-921    | 0.7 - 1.3 | 0.6 - 1.2 | 0.7 - 1.1 | 0.6 - 1.0 | 0.6 - 1.2 | 0.8 - 1.4 | 1.0 - 1.7 | 1.0 - 1.6 | 1.2 - 1.7 | 0.8 - 1.4 | 0.7 - 1.4 | 0.7 - 1.2 |
| A-922    | 0.7 - 1.3 | 0.8 - 1.2 | 0.7 - 1.1 | 0.6 - 1.1 | 0.6 - 1.2 | 0.6 - 1.2 | 0.7 - 1.1 | 0.9 - 1.2 | 0.8 - 1.5 | 1.0 - 1.4 | 0.8 - 1.5 | 0.7 - 1.4 |
| A-924    | 0.9 - 1.2 | 0.9 - 1.2 | 0.8 - 1.1 | 0.8 - 1.1 | 0.7 - 1.3 | 1.0 - 1.5 | 1.1 - 1.7 | 1.0 - 1.6 | 0.9 - 1.5 | 1.0 - 1.3 | 0.9 - 1.3 | 0.9 - 1.2 |
| A-926    | 0.7 - 1.4 | 0.7 - 1.2 | 0.6 - 1.1 | 0.5 - 1.1 | 0.7 - 1.3 | 0.8 - 1.4 | 1.0 - 1.6 | 0.9 - 1.6 | 0.9 - 1.3 | 0.9 - 1.2 | 0.9 - 1.4 | 0.8 - 1.5 |
| A-927    | 0.8 - 1.8 | 1.1 - 1.8 | 1.0 - 1.6 | 0.6 - 1.6 | 0.7 - 1.9 | 1.5 - 2.2 | 1.5 - 2.3 | 1.5 - 2.3 | 1.2 - 2.3 | 0.8 - 2.2 | 1.1 - 1.9 | 1.2 - 1.9 |
| A-928    | 0.5 - 1.1 | 0.4 - 1.1 | 0.5 - 0.9 | 0.4 - 1.0 | 0.5 - 0.9 | 0.5 - 1.1 | 0.7 - 1.3 | 0.5 - 1.1 | 0.6 - 1.2 | 0.5 - 1.2 | 0.4 - 1.2 | 0.5 - 1.1 |
| A-929    | 0.9 - 2.0 | 1.0 - 2.1 | 0.7 - 1.8 | 0.9 - 1.8 | 1.1 - 2.1 | 0.9 - 2.3 | 0.8 - 2.6 | 0.9 - 2.8 | 0.9 - 2.5 | 0.5 - 2.2 | 0.7 - 1.9 | 1.0 - 2.0 |
| A-930    | 0.5 - 1.1 | 0.5 - 1.0 | 0.5 - 1.0 | 0.5 - 1.0 | 0.6 - 1.1 | 0.6 - 1.3 | 0.7 - 1.3 | 0.7 - 1.5 | 0.7 - 1.3 | 0.6 - 1.3 | 0.5 - 1.2 | 0.5 - 1.2 |
| A-931    | 1.2 - 2.0 | 0.6 - 1.9 | 0.6 - 1.7 | 0.9 - 1.8 | 0.9 - 1.8 | 1.0 - 2.4 | 1.4 - 2.5 | 1.8 - 2.6 | 1.8 - 2.5 | 1.3 - 2.4 | 1.4 - 2.2 | 1.2 - 2.2 |
| A-932    | 0.3 - 0.8 | 0.3 - 1.0 | 0.3 - 1.0 | 0.3 - 0.8 | 0.4 - 0.8 | 0.4 - 0.9 | 0.4 - 1.0 | 0.4 - 1.2 | 0.4 - 1.1 | 0.4 - 1.1 | 0.4 - 0.9 | 0.4 - 0.8 |
| A-933    | 0.2 - 1.5 | 0.2 - 1.2 | 0.1 - 1.4 | 0.4 - 1.4 | 0.4 - 1.7 | 0.2 - 1.5 | 0.2 - 1.9 | 0.5 - 2.2 | 0.8 - 3.4 | 0.5 - 1.6 | 0.3 - 1.5 | 0.0 - 1.3 |
| A-934    | 1.5 - 2.3 | 1.4 - 2.1 | 1.2 - 2.1 | 0.9 - 1.9 | 1.3 - 2.0 | 1.4 - 2.0 | 1.5 - 2.1 | 1.7 - 2.3 | 1.7 - 2.5 | 1.6 - 2.4 | 1.5 - 2.3 | 1.5 - 2.1 |
| A-935    | 0.7 - 0.9 | 0.6 - 0.9 | 0.5 - 0.8 | 0.5 - 0.8 | 0.5 - 0.8 | 0.6 - 1.1 | 0.6 - 1.2 | 0.7 - 1.2 | 0.7 - 1.1 | 0.7 - 1.1 | 0.7 - 1.0 | 0.6 - 1.0 |
| A-936    | 0.7 - 1.2 | 0.5 - 1.2 | 0.6 - 1.1 | 0.5 - 1.1 | 0.6 - 1.1 | 0.8 - 1.2 | 0.9 - 1.4 | 1.1 - 1.4 | 1.0 - 1.4 | 0.8 - 1.4 | 0.7 - 1.4 | 0.6 - 1.3 |
| A-937    | 0.4 - 1.0 | 0.5 - 1.0 | 0.4 - 0.8 | 0.5 - 1.0 | 0.7 - 1.0 | 0.6 - 1.1 | 0.6 - 1.2 | 0.6 - 1.2 | 0.8 - 1.2 | 0.7 - 1.3 | 0.8 - 1.1 | 0.7 - 1.1 |
